# Supplementary material for: People with Suspected COVID-19 Symptoms Were More Likely Depressed and Had Lower Health-Related Quality of Life: The Potential Benefit of Health Literacy
Source: PubMed Central journal article supplement (PMC7231234; doi:10.3390/jcm9040965), 2020-03-31
Supplement: jcm-09-00965-s001.pdf [file jcm-09-00965-s001.pdf]

**Table S1.** Interaction effect of common suspected Covid-19 symptoms and health literacy on depression and health-related quality of life ( $n=3247$ ).

| Interaction                                                    | Depression (PHQ $\geq$ 10) |          |                     |          | HRQoL                   |          |                         |          |
|----------------------------------------------------------------|----------------------------|----------|---------------------|----------|-------------------------|----------|-------------------------|----------|
|                                                                | Model 1                    |          | Model 2             |          | Model 1                 |          | Model 2                 |          |
|                                                                | OR (95%CI)                 | <i>p</i> | OR (95%CI)          | <i>p</i> | B (95%CI)               | <i>p</i> | B (95%CI)               | <i>p</i> |
| Without S-Covid-19-S                                           | 1.00                       |          | 1.00                |          | 0.00                    |          | 0.00                    |          |
| With common S-Covid-19-S                                       | 13.54 (4.90, 37.39)        | <0.001   | 10.43 (3.68, 29.53) | <0.001   | -30.52 (-35.55, -25.50) | <0.001   | -27.10 (-32.21, -21.99) | <0.001   |
| HL index (1-score increment)                                   | 0.95 (0.93, 0.97)          | <0.001   | 0.95 (0.93, 0.98)   | <0.001   | 0.66 (0.58, 0.73)       | <0.001   | 0.44 (0.36, 0.52)       | <0.001   |
| With common S-Covid-19-S $\times$ HL index (1-score increment) | 0.95 (0.92, 0.99)          | 0.009    | 0.96 (0.93, 1.00)   | 0.038    | 0.70 (0.52, 0.87)       | <0.001   | 0.63 (0.45, 0.80)       | <0.001   |

Abbreviations: PHQ, patient health questionnaire; HRQoL, health-related quality of life; OR, odd ratio; B, regression coefficient; CI, confidence interval; S-Covid-19-S, suspected coronavirus disease-2019 symptoms; HL, health literacy.

Model 1: interaction between common S-Covid-19-S and health literacy

Model 2: interaction between common S-Covid-19-S and health literacy after adjusted for education, social status, eating behavior, and physical activity, as analyzed for depression; adjusted for age, gender, marital status, education, occupation, ability to pay for medication, social status, comorbidity, drinking and physical activity as analyzed for HRQoL.
